# Supplementary material
Source: PubMed Central journal article supplement (PMC4822307)
Supplement: EXCLI-12-916-s-001.pdf [file EXCLI-12-916-s-001.pdf]

**Supplementary Table 1:** Individual data of descriptive, demographic, anthropometric and clinical characteristics in the group of non-addicted subjects (n= 88)

| Group 1               | Opium use age (year) <sup>a</sup> | BMI <sup>b</sup> | Cigarette smoking <sup>c</sup> | FBS <sup>d</sup> | CHOL <sup>e</sup> | TG <sup>f</sup> | HDL <sup>g</sup> | LDL <sup>h</sup> | Adiponectin (µg/ml) | Leptin (ng/ml) | mean sys <sup>i</sup> | mean dias <sup>i</sup> | Adiponectine (Log) <sup>j</sup> | Leptin (Log) <sup>j</sup> |      |       |
|-----------------------|-----------------------------------|------------------|--------------------------------|------------------|-------------------|-----------------|------------------|------------------|---------------------|----------------|-----------------------|------------------------|---------------------------------|---------------------------|------|-------|
| Control (non addicts) | 1                                 | Never            | 35                             | 16,73            | Yes               | 84              | 113              | 72               | 39,00               | 59,6           | 17,10                 | 0,5                    | 110                             | 72,5                      | 1,23 | -0,30 |
|                       | 1                                 | Never            | 50                             | 19,96            | Yes               | 93              | 149              | 76               | 38,00               | 95,8           | 9,00                  | 0,5                    | 100                             | 60                        | 0,95 | -0,30 |
|                       | 1                                 | Never            | 42                             | 24,70            | No                | 76              | 183              | 66               | 55,00               | 114,8          | 16,71                 | 0,5                    | 100                             | 70                        | 1,22 | -0,30 |
|                       | 1                                 | Never            | 35                             | 25,35            | No                | 94              | 196              | 75               | 42,00               | 139            | 10,67                 | 0,5                    | 110                             | 80                        | 1,03 | -0,30 |
|                       | 1                                 | Never            | 41                             | 30,52            | No                | 90              | 144              | 53               | 38,00               | 95,4           | 8,10                  | 0,5                    | 90                              | 60                        | 0,91 | -0,30 |
|                       | 1                                 | Never            | 49                             | 31,81            | Yes               | 117             | 184              | 162              | 36,00               | 115,6          | 3,14                  | 0,5                    | 100                             | 80                        | 0,50 | -0,30 |
|                       | 1                                 | Never            | 46                             | 27,11            | Yes               | 86              | 228              | 667              | 24,00               | 114,7          | 4,48                  | 0,9                    | 130                             | 90                        | 0,65 | -0,05 |
|                       | 1                                 | Never            | 50                             | 25,26            | No                | 83              | 209              | 78               | 34,00               | 159,4          | 3,69                  | 1,3                    | 110                             | 70                        | 0,57 | 0,11  |
|                       | 1                                 | Never            | 42                             | 24,25            | No                | 89              | 209              | 88               | 28,00               | 163,4          | 5,83                  | 1,5                    | 110                             | 70                        | 0,77 | 0,18  |
|                       | 1                                 | Never            | 38                             | 29,05            | No                | 95              | 172              | 129              | 51,00               | 95,2           | 7,50                  | 1,5                    | 100                             | 70                        | 0,88 | 0,18  |
|                       | 1                                 | Never            | 42                             | 25,62            | No                | 86              | 188              | 146              | 31,00               | 127,8          | 1,81                  | 1,9                    | 165                             | 115                       | 0,26 | 0,28  |
|                       | 1                                 | Never            | 40                             | 26,77            | No                | 88              | 203              | 74               | 36,00               | 152,2          | 12,24                 | 2,3                    | 110                             | 80                        | 1,09 | 0,36  |
|                       | 1                                 | Never            | 39                             | 24,21            | No                | 100             | 251              | 420              | 32,00               | 163,9          | 7,00                  | 2,5                    | 110                             | 70                        | 0,85 | 0,40  |
|                       | 1                                 | Never            | 48                             | 25,67            | Yes               | 81              | 165              | 88               | 37,00               | 110,4          | 9,62                  | 2,5                    | 120                             | 80                        | 0,98 | 0,40  |
|                       | 1                                 | Never            | 46                             | 23,84            | No                | 79              | 150              | 76               | 30,00               | 104,8          | 7,14                  | 2,7                    | 110                             | 70                        | 0,85 | 0,43  |
|                       | 1                                 | Never            | 40                             | 23,48            | No                | 72              | 172              | 136              | 35,00               | 109,8          | 13,62                 | 2,9                    | 120                             | 80                        | 1,13 | 0,46  |
|                       | 1                                 | Never            | 45                             | 23,29            | No                | 102             | 214              | 240              | 31,00               | 135            | 6,88                  | 3,1                    | 145                             | 97,5                      | 0,84 | 0,49  |
|                       | 1                                 | Never            | 35                             | 24,96            | No                | 85              | 225              | 217              | 35,00               | 146,6          | 29,83                 | 3,1                    | 132,5                           | 87,5                      | 1,47 | 0,49  |
|                       | 1                                 | Never            | 42                             | 24,00            | No                | 101             | 250              | 346              | 32,00               | 148,8          | 11,83                 | 3,1                    | 112,5                           | 85                        | 1,07 | 0,49  |
|                       | 1                                 | Never            | 42                             | 25,01            | No                | 102             | 202              | 355              | 18,00               | 113            | 1,40                  | 3,5                    | 100                             | 80                        | 0,15 | 0,54  |
|                       | 1                                 | Never            | 46                             | 25,83            | No                | 103             | 205              | 225              | 26,00               | 134            | 1,86                  | 3,5                    | 100                             | 80                        | 0,27 | 0,54  |
|                       | 1                                 | Never            | 42                             | 25,14            | No                | 87              | 236              | 132              | 32,00               | 177,6          | 27,19                 | 3,5                    | 110                             | 80                        | 1,43 | 0,54  |
|                       | 1                                 | Never            | 49                             | 23,91            | No                | 87              | 149              | 112              | 28,00               | 98,6           | 1,26                  | 3,7                    | 110                             | 75                        | 0,10 | 0,57  |
|                       | 1                                 | Never            | 40                             | 29,23            | Yes               | 93              | 192              | 119              | 30,00               | 138,2          | 2,71                  | 3,7                    | 130                             | 80                        | 0,43 | 0,57  |
|                       | 1                                 | Never            | 44                             | 26,61            | No                | 87              | 255              | 118              | 36,00               | 195,4          | 18,55                 | 3,7                    | 120                             | 80                        | 1,27 | 0,57  |
|                       | 1                                 | Never            | 50                             | missed           | Yes               | 76              | 212              | 164              | 39,00               | 140,2          | 47,10                 | 3,9                    | 120                             | 80                        | 1,67 | 0,59  |
|                       | 1                                 | Never            | 35                             | 24,45            | No                | 249             | 152              | 139              | 25,00               | 99,2           | 13,81                 | 3,9                    | 130                             | 90                        | 1,14 | 0,59  |
|                       | 1                                 | Never            | 49                             | 23,84            | Yes               | 88              | 187              | 111              | 27,00               | 137,8          | 4,31                  | 3,9                    | 130                             | 80                        | 0,63 | 0,59  |
|                       | 1                                 | Never            | 46                             | 23,13            | No                | 94              | 144              | 146              | 31,00               | 83,8           | 3,76                  | 4,7                    | 120                             | 80                        | 0,58 | 0,67  |
|                       | 1                                 | Never            | 44                             | 25,91            | No                | 103             | 229              | 294              | 33,00               | 137,2          | 4,45                  | 4,7                    | 100                             | 80                        | 0,65 | 0,67  |
|                       | 1                                 | Never            | 36                             | 26,94            | No                | 89              | 189              | 109              | 38,00               | 129,2          | 11,79                 | 4,9                    | 80                              | 60                        | 1,07 | 0,69  |
|                       | 1                                 | Never            | 42                             | 29,30            | No                | 122             | 198              | 137              | 31,00               | 139,6          | 2,71                  | 4,9                    | 130                             | 80                        | 0,43 | 0,69  |
|                       | 1                                 | Never            | 41                             | 25,91            | No                | 89              | 198              | 65               | 39,00               | 146            | 6,14                  | 5,7                    | 120                             | 80                        | 0,79 | 0,76  |
|                       | 1                                 | Never            | 38                             | 31,06            | Yes               | 87              | 136              | 119              | 40,00               | 72,2           | 35,79                 | 5,7                    | 120                             | 80                        | 1,55 | 0,76  |
|                       | 1                                 | Never            | 38                             | 22,26            | Yes               | 110             | 302              | 725              | 25,00               | 132,4          | 4,19                  | 5,9                    | 90                              | 70                        | 0,62 | 0,77  |
|                       | 1                                 | Never            | 44                             | 26,09            | Yes               | 86              | 222              | 165              | 31,00               | 158            | 5,76                  | 6,3                    | 115                             | 80                        | 0,76 | 0,80  |
|                       | 1                                 | Never            | 50                             | 26,78            | Yes               | 87              | 239              | 153              | 30,00               | 178,4          | 3,79                  | 6,5                    | 120                             | 80                        | 0,58 | 0,81  |
|                       | 1                                 | Never            | 49                             | 34,12            | Yes               | 96              | 163              | 139              | 33,00               | 102,2          | 12,36                 | 7,3                    | 110                             | 70                        | 1,09 | 0,86  |
|                       | 1                                 | Never            | 41                             | 24,12            | Yes               | 80              | 162              | 167              | 26,00               | 102,6          | 5,36                  | 8,1                    | 105                             | 70                        | 0,73 | 0,91  |
|                       | 1                                 | Never            | 39                             | 37,22            | Yes               | 72              | 164              | 194              | 30,00               | 95,2           | 7,79                  | 8,1                    | 105                             | 77,5                      | 0,89 | 0,91  |
|                       | 1                                 | Never            | 50                             | 26,00            | No                | 105             | 222              | 112              | 34,00               | 165,6          | 13,55                 | 8,3                    | 130                             | 90                        | 1,13 | 0,92  |
|                       | 1                                 | Never            | 41                             | 23,29            | No                | 88              | 246              | 168              | 34,00               | 178,4          | 10,43                 | 8,5                    | 100                             | 70                        | 1,02 | 0,93  |
|                       | 1                                 | Never            | 47                             | 25,49            | Yes               | 97              | 236              | 237              | 38,00               | 150,6          | 3,64                  | 8,7                    | 120                             | 80                        | 0,56 | 0,94  |
|                       | 1                                 | Never            | 37                             | 27,76            | No                | 96              | 132              | 102              | 31,00               | 80,6           | 4,79                  | 9,1                    | 100                             | 80                        | 0,68 | 0,96  |
|                       | 1                                 | Never            | 39                             | 23,46            | Yes               | 78              | 160              | 91               | 25,00               | 116,8          | 15,33                 | 9,3                    | 100                             | 80                        | 1,19 | 0,97  |
|                       | 1                                 | Never            | 47                             | 34,12            | Yes               | 99              | 176              | 120              | 43,00               | 109            | 11,93                 | 9,5                    | 110                             | 80                        | 1,08 | 0,98  |
|                       | 1                                 | Never            | 35                             | 29,92            | No                | 111             | 179              | 181              | 24,00               | 118,8          | 1,88                  | 9,7                    | 110                             | 70                        | 0,27 | 0,99  |
|                       | 1                                 | Never            | 36                             | 27,11            | No                | 222             | 157              | 189              | 22,00               | 115,2          | 2,29                  | 10,1                   | 130                             | 80                        | 0,36 | 1,00  |
|                       | 1                                 | Never            | 43                             | 27,12            | Yes               | 93              | 225              | 149              | 61,00               | 134,2          | 6,62                  | 10,5                   | 100                             | 50                        | 0,82 | 1,02  |
|                       | 1                                 | Never            | 38                             | 21,67            | No                | 116             | 124              | 128              | 22,00               | 76,4           | 3,74                  | 10,7                   | 110                             | 70                        | 0,57 | 1,03  |
|                       | 1                                 | Never            | 42                             | 23,33            | No                | 117             | 166              | 115              | 44,00               | 99             | 11,60                 | 11,1                   | 130                             | 90                        | 1,06 | 1,05  |
|                       | 1                                 | Never            | 46                             | 27,90            | Yes               | 99              | 297              | 245              | 41,00               | 207            | 2,93                  | 11,1                   | 120                             | 90                        | 0,47 | 1,05  |

**Supplementary Table 1:** Individual data of descriptive, demographic, anthropometric and clinical characteristics in the group of non-addicted subjects (n= 88)

| Group 1               | Opium use age (year) <sup>a</sup> | BMI <sup>b</sup> | Cigarette smoking <sup>c</sup> | FBS <sup>d</sup> | CHOL <sup>e</sup> | TG <sup>f</sup> | HDL <sup>g</sup> | LDL <sup>h</sup> | Adiponectin (µg/ml) | Leptin (ng/ml) | mean sys <sup>i</sup> | mean dias <sup>i</sup> | Adiponectine (Log) <sup>j</sup> | Leptin (Log) <sup>j</sup> |      |      |
|-----------------------|-----------------------------------|------------------|--------------------------------|------------------|-------------------|-----------------|------------------|------------------|---------------------|----------------|-----------------------|------------------------|---------------------------------|---------------------------|------|------|
| Control (non addicts) | 1                                 | Never            | 48                             | 23,89            | Yes               | 107             | 227              | 838              | 26,00               | 143,6          | 5,74                  | 11,3                   | 130                             | 80                        | 0,76 | 1,05 |
|                       | 1                                 | Never            | 36                             | 29,07            | Yes               | 77              | 196              | 72               | 41,00               | 140,6          | 4,19                  | 11,3                   | 80                              | 60                        | 0,62 | 1,05 |
|                       | 1                                 | Never            | 36                             | 26,73            | No                | 124             | 242              | 201              | 30,00               | 171,8          | 7,74                  | 11,5                   | 130                             | 87,5                      | 0,89 | 1,06 |
|                       | 1                                 | Never            | 40                             | 28,60            | Yes               | 104             | 209              | 190              | 27,00               | 144            | 6,67                  | 11,7                   | 120                             | 80                        | 0,82 | 1,07 |
|                       | 1                                 | Never            | 36                             | 27,88            | No                | 83              | 190              | 126              | 34,00               | 130,8          | 14,00                 | 12,1                   | 100                             | 70                        | 1,15 | 1,08 |
|                       | 1                                 | Never            | 38                             | 21,63            | No                | 75              | 222              | 91               | 27,00               | 176,8          | 13,10                 | 12,7                   | 90                              | 70                        | 1,12 | 1,10 |
|                       | 1                                 | Never            | 47                             | 24,68            | Yes               | 116             | 220              | 147              | 25,00               | 165,6          | 22,33                 | 12,9                   | 110                             | 70                        | 1,35 | 1,11 |
|                       | 1                                 | Never            | 48                             | 28,40            | No                | 79              | 228              | 197              | 28,00               | 160,6          | 23,38                 | 14,7                   | 120                             | 87,5                      | 1,37 | 1,17 |
|                       | 1                                 | Never            | 49                             | 28,09            | No                | 82              | 224              | 220              | 36,00               | 144            | 14,86                 | 15,5                   | 125                             | 90                        | 1,17 | 1,19 |
|                       | 1                                 | Never            | 50                             | 25,25            | No                | 93              | 161              | 185              | 38,00               | 86             | 3,57                  | 15,9                   | 110                             | 70                        | 0,55 | 1,20 |
|                       | 1                                 | Never            | 35                             | 27,81            | Yes               | 83              | 176              | 138              | 37,00               | 111,4          | 6,05                  | 15,9                   | 160                             | 80                        | 0,78 | 1,20 |
|                       | 1                                 | Never            | 41                             | 25,67            | No                | 87              | 220              | 215              | 36,00               | 141            | 21,79                 | 16,7                   | 120                             | 80                        | 1,34 | 1,22 |
|                       | 1                                 | Never            | 43                             | 28,70            | Yes               | 96              | 188              | 201              | 24,00               | 123,8          | 6,33                  | 17,1                   | 120                             | 85                        | 0,80 | 1,23 |
|                       | 1                                 | Never            | 44                             | 27,26            | Yes               | 138             | 200              | 78               | 35,00               | 149,4          | 3,31                  | 17,5                   | 100                             | 70                        | 0,52 | 1,24 |
|                       | 1                                 | Never            | 44                             | 32,79            | Yes               | 97              | 163              | 168              | 28,00               | 101,4          | 18,88                 | 17,5                   | 130                             | 80                        | 1,28 | 1,24 |
|                       | 1                                 | Never            | 40                             | 29,82            | Yes               | 90              | 205              | 254              | 26,00               | 128,2          | 8,83                  | 18,9                   | 120                             | 70                        | 0,95 | 1,28 |
|                       | 1                                 | Never            | 38                             | 30,22            | Yes               | 85              | 199              | 212              | 26,00               | 130,6          | 5,02                  | 18,9                   | 125                             | 82,5                      | 0,70 | 1,28 |
|                       | 1                                 | Never            | 43                             | 24,39            | No                | 186             | 178              | 149              | 31,00               | 117,2          | 23,43                 | 19,3                   | 110                             | 70                        | 1,37 | 1,29 |
|                       | 1                                 | Never            | 49                             | 25,43            | No                | 95              | 302              | 141              | 43,00               | 230,8          | 11,38                 | 19,7                   | 140                             | 85                        | 1,06 | 1,29 |
|                       | 1                                 | Never            | 49                             | 24,74            | No                | 104             | 186              | 105              | 28,00               | 137            | 4,43                  | 20,7                   | 110                             | 80                        | 0,65 | 1,32 |
|                       | 1                                 | Never            | 41                             | 25,00            | No                | 95              | 149              | 146              | 29,00               | 90,8           | 9,43                  | 20,9                   | 110                             | 80                        | 0,97 | 1,32 |
|                       | 1                                 | Never            | 46                             | 33,91            | No                | 308             | 212              | 368              | 23,00               | 116,5          | 1,45                  | 23,3                   | 92,5                            | 70                        | 0,16 | 1,37 |
|                       | 1                                 | Never            | 36                             | 24,39            | No                | 95              | 232              | 224              | 42,00               | 145,2          | 5,64                  | 23,5                   | 110                             | 70                        | 0,75 | 1,37 |
|                       | 1                                 | Never            | 42                             | 29,59            | No                | 75              | 267              | 195              | 41,00               | 187            | 9,81                  | 23,9                   | 110                             | 80                        | 0,99 | 1,38 |
|                       | 1                                 | Never            | 42                             | 32,04            | No                | 116             | 235              | 428              | 28,00               | 146,6          | 4,31                  | 25,7                   | 155                             | 100                       | 0,63 | 1,41 |
|                       | 1                                 | Never            | 38                             | 27,28            | No                | 98              | 254              | 177              | 38,00               | 180,6          | 22,36                 | 25,9                   | 110                             | 80                        | 1,35 | 1,41 |
|                       | 1                                 | Never            | 35                             | 33,58            | No                | 103             | 160              | 333              | 21,00               | 72             | 3,98                  | 26,7                   | 125                             | 85                        | 0,60 | 1,43 |
|                       | 1                                 | Never            | 46                             | 23,59            | No                | 95              | 160              | 235              | 26,00               | 87             | 14,45                 | 28,9                   | 110                             | 70                        | 1,16 | 1,46 |
|                       | 1                                 | Never            | 43                             | 25,34            | No                | 105             | 249              | 263              | 31,00               | 165,4          | 7,24                  | 28,9                   | 127,5                           | 87,5                      | 0,86 | 1,46 |
|                       | 1                                 | Never            | 40                             | 26,58            | No                | 97              | 154              | 84               | 37,00               | 100,2          | 5,14                  | 30,3                   | 130                             | 95                        | 0,71 | 1,48 |
|                       | 1                                 | Never            | 47                             | 26,45            | Yes               | 100             | 116              | 89               | 25,00               | 73,2           | 2,33                  | 31,5                   | 135                             | 75                        | 0,37 | 1,50 |
|                       | 1                                 | Never            | 48                             | 30,85            | Yes               | 117             | 145              | 248              | 31,00               | 64,4           | 8,07                  | 32,5                   | 120                             | 80                        | 0,91 | 1,51 |
|                       | 1                                 | Never            | 35                             | 30,72            | No                | 82              | 193              | 179              | 34,00               | 123,2          | 5,17                  | 32,5                   | 120                             | 90                        | 0,71 | 1,51 |
|                       | 1                                 | Never            | 42                             | 22,82            | Yes               | 92              | 227              | 154              | 31,00               | 165,2          | 6,64                  | 36,1                   | 120                             | 85                        | 0,82 | 1,56 |
|                       | 1                                 | Never            | 47                             | 26,34            | Yes               | 156             | 157              | 102              | 40,00               | 96,6           | 17,45                 | 36,5                   | 165                             | 80                        | 1,24 | 1,56 |
|                       | 1                                 | Never            | 48                             | 28,93            | No                | 86              | 240              | 160              | 41,00               | 167            | 14,26                 | 48,7                   | 125                             | 90                        | 1,15 | 1,69 |
|                       | <b>Mean</b>                       |                  | <b>42,5</b>                    | <b>26,7</b>      |                   |                 |                  |                  | <b>9,8</b>          | <b>11,8</b>    | <b>116,2</b>          | <b>78,6</b>            | <b>0,86</b>                     | <b>0,86</b>               |      |      |
|                       | <b>SD</b>                         |                  | <b>4,7</b>                     | <b>3,4</b>       |                   |                 |                  |                  | <b>8,0</b>          | <b>10,4</b>    | <b>16,2</b>           | <b>9,6</b>             | <b>0,34</b>                     | <b>0,50</b>               |      |      |
|                       | <b>n</b>                          |                  | <b>88</b>                      | <b>88</b>        |                   |                 |                  |                  | <b>88</b>           | <b>88</b>      | <b>88</b>             | <b>88</b>              | <b>88</b>                       | <b>88</b>                 |      |      |

a) mean age, b) Body mass index (BMI) which is calculated by dividing the weight (Kg) by squared height (m<sup>2</sup>), c) the comparison of the frequency of those who never smoked cigarette with those who were cigarette smokers between two groups, d) Fasting blood glucose; Normal (<126 mg/dl) and Diabetic (FBG ≥ 126 mg/dl), e) Cholesterol; Normal (<240 mg/dl) and Hypercholesterolemia (>240 mg/dl), f) Triglyceride; Normal (<200 mg/dl) and Hypertriglyceridemia (>200 mg/dl), g) High density lipoprotein; Normal (>40 mg/dl) and Low HDL (<40 mg/dl), h) Low density lipoprotein; Normal (<130 mg/dl) and High LDL (>130mg/dl), i) Blood pressure; Normal (<140/90 mmHg) and Hypertensive (>140/90 mmHg), j). Because the two variables of adiponectin (unitµg/ml) and leptin(unitng/ml) were not normally distributed, we logarithmically transforme them.

**Supplementary Table 2:** Individual data of descriptive, demographic, anthropometric and clinical characteristics in the group of addicted subjects (n= 88)

| Group 2        | Opium use    | age (year) <sup>a</sup> | BMI <sup>b</sup> | Cigarette smoking <sup>c</sup> | FBS <sup>d</sup> | CHOL <sup>e</sup> | TG <sup>f</sup> | HDL <sup>g</sup> | LDL <sup>h</sup> | Adiponectin (µg/ml) | Leptin (ng/ml) | mean sys <sup>i</sup> | mean dias <sup>i</sup> | Adiponectine (Log) <sup>j</sup> | Leptin (Log) <sup>j</sup> |
|----------------|--------------|-------------------------|------------------|--------------------------------|------------------|-------------------|-----------------|------------------|------------------|---------------------|----------------|-----------------------|------------------------|---------------------------------|---------------------------|
| Case (Addicts) |              |                         |                  |                                |                  |                   |                 |                  |                  |                     |                |                       |                        |                                 |                           |
| 2              | current user | 39                      | 18,06            | Yes                            | 88               | 195               | 238             | 31,00            | 116,4            | 12,93               | 0,38           | 100                   | 70                     | 1,11                            | -0,42                     |
| 2              | current user | 43                      | 20,05            | Yes                            | 85               | 127               | 67              | 30,00            | 83,6             | 7,04                | 0,43           | 90                    | 60                     | 0,85                            | -0,37                     |
| 2              | current user | 47                      | 18,98            | Yes                            | 76               | 154               | 70              | 45,00            | 95               | 7,94                | 0,48           | 110                   | 75                     | 0,90                            | -0,32                     |
| 2              | current user | 44                      | 23,23            | No                             | 92               | 211               | 179             | 35,00            | 140,2            | 4,64                | 0,48           | 120                   | 80                     | 0,67                            | -0,32                     |
| 2              | current user | 50                      | 20,57            | No                             | 90               | 204               | 73              | 49,00            | 140,4            | 7,83                | 0,57           | 150                   | 80                     | 0,89                            | -0,24                     |
| 2              | current user | 43                      | 20,45            | No                             | 94               | 235               | 185             | 46,00            | 152              | 8,95                | 0,57           | 112,5                 | 80                     | 0,95                            | -0,24                     |
| 2              | current user | 47                      | 19,19            | Yes                            | 81               | 171               | 79              | 44,00            | 111,2            | 8,90                | 0,71           | 100                   | 70                     | 0,95                            | -0,15                     |
| 2              | current user | 43                      | 24,76            | No                             | 92               | 152               | 115             | 48,00            | 81               | 12,52               | 0,86           | 125                   | 75                     | 1,10                            | -0,07                     |
| 2              | current user | 45                      | 28,67            | No                             | 75               | 215               | 107             | 44,00            | 149,6            | 5,02                | 0,9            | 117,5                 | 80                     | 0,70                            | -0,05                     |
| 2              | current user | 49                      | 26,06            | Yes                            | 99               | 230               | 124             | 45,00            | 160,2            | 0,70                | 1,33           | 110                   | 70                     | -0,15                           | 0,12                      |
| 2              | current user | 49                      | 28,34            | No                             | 90               | 224               | 171             | 33,00            | 156,8            | 7,67                | 1,52           | 135                   | 80                     | 0,88                            | 0,18                      |
| 2              | current user | 41                      | 23,88            | Yes                            | 90               | 155               | 156             | 19,00            | 104,8            | 3,10                | 1,57           | 100                   | 70                     | 0,49                            | 0,20                      |
| 2              | current user | 50                      | 27,57            | No                             | 118              | 159               | 108             | 42,00            | 95,4             | 1,38                | 1,57           | 120                   | 70                     | 0,14                            | 0,20                      |
| 2              | current user | 45                      | 20,20            | Yes                            | 71               | 141               | 76              | 38,00            | 87,8             | 14,83               | 1,62           | 120                   | 90                     | 1,17                            | 0,21                      |
| 2              | current user | 40                      | 20,14            | Yes                            | 255              | 141               | 93              | 33,00            | 89,4             | 11,21               | 2              | 80                    | 60                     | 1,05                            | 0,30                      |
| 2              | current user | 43                      | 19,23            | Yes                            | 101              | 184               | 136             | 65,00            | 91,8             | 10,20               | 2              | 110                   | 72,5                   | 1,01                            | 0,30                      |
| 2              | current user | 41                      | 16,79            | Yes                            | 91               | 163               | 72              | 25,00            | 123,6            | 5,42                | 2              | 100                   | 70                     | 0,73                            | 0,30                      |
| 2              | current user | 42                      | 23,89            | Yes                            | 91               | 183               | 127             | 31,00            | 126,6            | 6,79                | 2              | 110                   | 50                     | 0,83                            | 0,30                      |
| 2              | current user | 50                      | 27,12            | Yes                            | 124              | 238               | 323             | 33,00            | 140,4            | 7,53                | 2,05           | 100                   | 77,5                   | 0,88                            | 0,31                      |
| 2              | current user | 37                      | 21,00            | Yes                            | 91               | 182               | 134             | 37,00            | 118,2            | 14,62               | 2,1            | 100                   | 60                     | 1,16                            | 0,32                      |
| 2              | current user | 40                      | 20,26            | Yes                            | 98               | 203               | 104             | 35,00            | 147,2            | 8,43                | 2,38           | 90                    | 50                     | 0,93                            | 0,38                      |
| 2              | current user | 46                      | 26,01            | Yes                            | 71               | 171               | 195             | 26,00            | 106              | 4,38                | 2,76           | 100                   | 80                     | 0,64                            | 0,44                      |
| 2              | current user | 43                      | 21,80            | Yes                            | 100              | 276               | 750             | 36,00            | 101,5            | 2,33                | 2,86           | 90                    | 70                     | 0,37                            | 0,46                      |
| 2              | current user | 41                      | 19,01            | Yes                            | 86               | 121               | 113             | 30,00            | 68,4             | 9,69                | 3              | 100                   | 60                     | 0,99                            | 0,48                      |
| 2              | current user | 50                      | 21,55            | Yes                            | 81               | 140               | 139             | 41,00            | 71,2             | 7,88                | 3              | 100                   | 70                     | 0,90                            | 0,48                      |
| 2              | current user | 48                      | 21,72            | No                             | 77               | 164               | 114             | 35,00            | 106,2            | 3,07                | 3              | 147,5                 | 90                     | 0,49                            | 0,48                      |
| 2              | current user | 43                      | 23,15            | No                             | 146              | 165               | 115             | 52,00            | 90               | 6,36                | 3,14           | 117,5                 | 90                     | 0,80                            | 0,50                      |
| 2              | current user | 40                      | 18,44            | No                             | 78               | 150               | 90              | 34,00            | 98               | 8,10                | 3,24           | 100                   | 70                     | 0,91                            | 0,51                      |
| 2              | current user | 47                      | 20,91            | Yes                            | 99               | 274               | 184             | 33,00            | 204,2            | 3,07                | 3,52           | 120                   | 80                     | 0,49                            | 0,55                      |
| 2              | current user | 36                      | 22,78            | No                             | 92               | 208               | 394             | 28,00            | 79,5             | 9,21                | 3,57           | 112,5                 | 75                     | 0,96                            | 0,55                      |
| 2              | current user | 41                      | 29,19            | No                             | 89               | 212               | 133             | 39,00            | 146,4            | 9,98                | 3,81           | 130                   | 100                    | 1,00                            | 0,58                      |
| 2              | current user | 38                      | 18,44            | Yes                            | 90               | 217               | 132             | 35,00            | 155,6            | 12,19               | 4,43           | 90                    | 60                     | 1,09                            | 0,65                      |
| 2              | current user | 40                      | 28,67            | No                             | 91               | 250               | 221             | 26,00            | 179,8            | 4,07                | 4,52           | 120                   | 80                     | 0,61                            | 0,66                      |
| 2              | current user | 50                      | 22,36            | Yes                            | 89               | 227               | 160             | 49,00            | 146              | 6,07                | 4,81           | 100                   | 70                     | 0,78                            | 0,68                      |
| 2              | current user | 45                      | 24,24            | Yes                            | 79               | 166               | 82              | 37,00            | 112,6            | 5,74                | 5,29           | 100                   | 70                     | 0,76                            | 0,72                      |
| 2              | current user | 48                      | 28,72            | No                             | 96               | 109               | 214             | 28,00            | 38,2             | 5,43                | 5,38           | 125                   | 92,5                   | 0,73                            | 0,73                      |
| 2              | current user | 47                      | 26,06            | No                             | 86               | 189               | 297             | 29,00            | 100,6            | 10,26               | 5,52           | 122,5                 | 90                     | 1,01                            | 0,74                      |
| 2              | current user | 38                      | 20,98            | Yes                            | 112              | 197               | 120             | 41,00            | 132              | 5,53                | 6,19           | 110                   | 70                     | 0,74                            | 0,79                      |
| 2              | current user | 44                      | 26,23            | Yes                            | 146              | 217               | 127             | 36,00            | 155,6            | 7,90                | 7,43           | 110                   | 70                     | 0,90                            | 0,87                      |
| 2              | current user | 41                      | 26,73            | No                             | 106              | 192               | 179             | 30,00            | 126,2            | 6,00                | 7,62           | 110                   | 65                     | 0,78                            | 0,88                      |
| 2              | current user | 37                      | 28,39            | No                             | 75               | 113               | 58              | 31,00            | 70,4             | 3,38                | 8,62           | 110                   | 90                     | 0,53                            | 0,94                      |
| 2              | current user | 35                      | 27,28            | No                             | 107              | 274               | 168             | 43,00            | 197,4            | 11,86               | 9,38           | 120                   | 85                     | 1,07                            | 0,97                      |
| 2              | current user | 50                      | 18,72            | No                             | 118              | 151               | 101             | 37,00            | 93,8             | 6,29                | 9,48           | 130                   | 85                     | 0,80                            | 0,98                      |
| 2              | current user | 40                      | 29,04            | Yes                            | 103              | 127               | 47              | 51,00            | 66,6             | 0,66                | 9,52           | 135                   | 75                     | -0,18                           | 0,98                      |
| 2              | current user | 35                      | 27,12            | No                             | 89               | 158               | 304             | 18,00            | 79,2             | 4,38                | 9,67           | 112,5                 | 75                     | 0,64                            | 0,99                      |
| 2              | current user | 35                      | 26,23            | No                             | 77               | 142               | 78              | 37,00            | 89,4             | 3,88                | 9,71           | 100                   | 70                     | 0,59                            | 0,99                      |
| 2              | current user | 47                      | 28,78            | No                             | 102              | 169               | 183             | 26,00            | 106,4            | 2,52                | 10,05          | 120                   | 82,5                   | 0,40                            | 1,00                      |
| 2              | current user | 50                      | 25,19            | Yes                            | 90               | 219               | 229             | 37,00            | 136,2            | 2,11                | 10,24          | 130                   | 90                     | 0,32                            | 1,01                      |
| 2              | current user | 41                      | 27,48            | Yes                            | 116              | 281               | 172             | 35,00            | 211,6            | 3,09                | 10,24          | 120                   | 82,5                   | 0,49                            | 1,01                      |
| 2              | current user | 50                      | 21,19            | No                             | 89               | 141               | 100             | 44,00            | 77               | 2,98                | 10,76          | 130                   | 80                     | 0,47                            | 1,03                      |
| 2              | current user | 40                      | 27,18            | Yes                            | 86               | 146               | 119             | 37,00            | 85,2             | 8,00                | 11,29          | 120                   | 80                     | 0,90                            | 1,05                      |
| 2              | current user | 48                      | 28,34            | No                             | 111              | 188               | 226             | 29,00            | 113,8            | 1,76                | 11,43          | 125                   | 85                     | 0,25                            | 1,06                      |
| 2              | current user | 41                      | 24,15            | Yes                            | 159              | 221               | 107             | 38,00            | 161,6            | 8,45                | 11,57          | 120                   | 80                     | 0,93                            | 1,06                      |

**Supplementary Table 2:** Individual data of descriptive, demographic, anthropometric and clinical characteristics in the group of addicted subjects (n= 88)

| Group 2               | Opium use    | age (year) <sup>a</sup> | BMI <sup>b</sup> | Cigarette smoking <sup>c</sup> | FBS <sup>d</sup> | CHOL <sup>e</sup> | TG <sup>f</sup> | HDL <sup>g</sup> | LDL <sup>h</sup> | Adiponectin (µg/ml) | Leptin (ng/ml) | mean sys <sup>i</sup> | mean dias <sup>i</sup> | Adiponectine (Log) <sup>j</sup> | Leptin (Log) <sup>j</sup> |
|-----------------------|--------------|-------------------------|------------------|--------------------------------|------------------|-------------------|-----------------|------------------|------------------|---------------------|----------------|-----------------------|------------------------|---------------------------------|---------------------------|
| <b>Case (Addicts)</b> |              |                         |                  |                                |                  |                   |                 |                  |                  |                     |                |                       |                        |                                 |                           |
| 2                     | current user | 41                      | 31,28            | No                             | 83               | 210               | 124             | 35,00            | 150,2            | 11,62               | 11,62          | 145                   | 110                    | 1,07                            | 1,07                      |
| 2                     | current user | 50                      | 28,75            | No                             | 104              | 245               | 179             | 35,00            | 174,2            | 4,52                | 12             | 140                   | 90                     | 0,66                            | 1,08                      |
| 2                     | current user | 47                      | 16,14            | Yes                            | 128              | 108               | 75              | 30,00            | 63               | 9,01                | 12,24          | 90                    | 70                     | 0,95                            | 1,09                      |
| 2                     | current user | 46                      | 27,93            | No                             | 90               | 165               | 96              | 43,00            | 102,8            | 3,02                | 13             | 130                   | 80                     | 0,48                            | 1,11                      |
| 2                     | current user | 49                      | 23,75            | Yes                            | 84               | 206               | 138             | 31,00            | 147,4            | 9,14                | 13,29          | 100                   | 70                     | 0,96                            | 1,12                      |
| 2                     | current user | 39                      | 28,27            | Yes                            | 90               | 239               | 212             | 33,00            | 163,6            | 3,88                | 13,48          | 120                   | 60                     | 0,59                            | 1,13                      |
| 2                     | current user | 46                      | 24,05            | Yes                            | 93               | 246               | 354             | 23,00            | 152,2            | 5,79                | 13,81          | 127,5                 | 80                     | 0,76                            | 1,14                      |
| 2                     | current user | 46                      | 18,56            | No                             | 103              | 161               | 54              | 38,00            | 112,2            | 2,45                | 14,62          | 107,5                 | 70                     | 0,39                            | 1,16                      |
| 2                     | current user | 50                      | 30,04            | No                             | 102              | 285               | 346             | 27,00            | 188,8            | 7,02                | 15,05          | 110                   | 70                     | 0,85                            | 1,18                      |
| 2                     | current user | 39                      | 25,04            | No                             | 106              | 204               | 292             | 30,00            | 115,6            | 1,26                | 15,67          | 120                   | 80                     | 0,10                            | 1,20                      |
| 2                     | current user | 42                      | 26,67            | Yes                            | 94               | 295               | 653             | 28,00            | 120,6            | 8,69                | 15,71          | 100                   | 80                     | 0,94                            | 1,20                      |
| 2                     | current user | 44                      | 29,91            | Yes                            | 113              | 187               | 109             | 34,00            | 131,2            | 4,33                | 15,76          | 120                   | 77,5                   | 0,64                            | 1,20                      |
| 2                     | current user | 45                      | 30,82            | No                             | 153              | 224               | 261             | 28,00            | 143,8            | 4,69                | 16,57          | 120                   | 80                     | 0,67                            | 1,22                      |
| 2                     | current user | 47                      | 26,57            | No                             | 100              | 106               | 207             | 20,00            | 44,6             | 10,21               | 16,9           | 125                   | 75                     | 1,01                            | 1,23                      |
| 2                     | current user | 47                      | 24,34            | No                             | 108              | 256               | 516             | 21,00            | 140,7            | 4,69                | 17             | 107,5                 | 70                     | 0,67                            | 1,23                      |
| 2                     | current user | 47                      | 24,57            | Yes                            | 142              | 177               | 131             | 40,00            | 110,8            | 7,06                | 17,14          | 135                   | 85                     | 0,85                            | 1,23                      |
| 2                     | current user | 49                      | 24,17            | No                             | 87               | 206               | 190             | 31,00            | 137              | 2,29                | 17,86          | 122,5                 | 80                     | 0,36                            | 1,25                      |
| 2                     | current user | 39                      | 22,55            | Yes                            | 106              | 263               | 607             | 15,00            | 130,4            | 5,29                | 18,52          | 110                   | 80                     | 0,72                            | 1,27                      |
| 2                     | current user | 50                      | 23,81            | No                             | 112              | 188               | 149             | 28,00            | 130,2            | 2,48                | 18,62          | 132,5                 | 95                     | 0,39                            | 1,27                      |
| 2                     | current user | 40                      | 26,60            | No                             | 92               | 186               | 97              | 39,00            | 127,6            | 10,57               | 19,1           | 100                   | 80                     | 1,02                            | 1,28                      |
| 2                     | current user | 49                      | 27,22            | Yes                            | 130              | 189               | 379             | 24,00            | 89,2             | 6,79                | 20,05          | 130                   | 90                     | 0,83                            | 1,30                      |
| 2                     | current user | 38                      | 17,61            | No                             | 76               | 194               | 62              | 53,00            | 128,6            | 6,62                | 20,1           | 120                   | 70                     | 0,82                            | 1,30                      |
| 2                     | current user | 43                      | 26,26            | Yes                            | 89               | 197               | 158             | 53,00            | 112,4            | 6,88                | 21             | 120                   | 80                     | 0,84                            | 1,32                      |
| 2                     | current user | 44                      | 24,02            | No                             | 107              | 146               | 84              | 27,00            | 102,2            | 2,60                | 23,14          | 121                   | 80,5                   | 0,41                            | 1,36                      |
| 2                     | current user | 39                      | 15,57            | No                             | 89               | 203               | 105             | 49,00            | 133              | 5,62                | 23,95          | 110                   | 72,5                   | 0,75                            | 1,38                      |
| 2                     | current user | 41                      | 32,01            | Yes                            | 88               | 181               | 86              | 39,00            | 124,8            | 18,17               | 26,67          | 100                   | 70                     | 1,26                            | 1,43                      |
| 2                     | current user | 41                      | 29,07            | No                             | 128              | 314               | 521             | 40,00            | 87,3             | 6,26                | 28,38          | 125                   | 87,5                   | 0,80                            | 1,45                      |
| 2                     | current user | 45                      | 25,19            | Yes                            | 91               | 176               | 213             | 27,00            | 106,4            | 8,60                | 28,81          | 140                   | 60                     | 0,93                            | 1,46                      |
| 2                     | current user | 42                      | 30,08            | Yes                            | 80               | 200               | 88              | 36,00            | 146,4            | 1,46                | 29,24          | 140                   | 90                     | 0,16                            | 1,47                      |
| 2                     | current user | 46                      | 25,20            | Yes                            | 83               | 267               | 242             | 34,00            | 184,6            | 13,40               | 30,95          | 100                   | 70                     | 1,13                            | 1,49                      |
| 2                     | current user | 44                      | 31,31            | Yes                            | 114              | 216               | 123             | 40,00            | 151,4            | 10,20               | 33,86          | 130                   | 87,5                   | 1,01                            | 1,53                      |
| 2                     | current user | 49                      | 24,58            | Yes                            | 145              | 173               | 162             | 33,00            | 107,6            | 8,54                | 37,33          | 110                   | 70                     | 0,93                            | 1,57                      |
| 2                     | current user | 37                      | 24,51            | No                             | 83               | 224               | 233             | 28,00            | 149,4            | 1,14                | 40,14          | 90                    | 70                     | 0,06                            | 1,60                      |
| 2                     | current user | 49                      | 19,72            | No                             | 84               | 211               | 265             | 34,00            | 124              | 0,88                | 40,95          | 90                    | 70                     | -0,06                           | 1,61                      |
| 2                     | current user | 41                      | 27,18            | No                             | 91               | 218               | 224             | 26,00            | 147,2            | 3,24                | 53,38          | 110                   | 70                     | 0,51                            | 1,73                      |
| <b>Mean</b>           |              | <b>43,8</b>             | <b>24,4</b>      |                                |                  |                   |                 |                  |                  | <b>6,51</b>         | <b>11,46</b>   | <b>114,50</b>         | <b>76,40</b>           | <b>0,73</b>                     | <b>0,81</b>               |
| <b>SD</b>             |              | <b>4,3</b>              | <b>4,0</b>       |                                |                  |                   |                 |                  |                  | <b>3,7</b>          | <b>10,9</b>    | <b>14,9</b>           | <b>10,4</b>            | <b>0,3</b>                      | <b>0,5</b>                |
| <b>n</b>              |              | <b>88</b>               | <b>88</b>        |                                |                  |                   |                 |                  |                  | <b>88</b>           | <b>88</b>      | <b>88</b>             | <b>88</b>              | <b>88</b>                       | <b>88</b>                 |

a) mean age, b) Body mass index (BMI) which is calculated by dividing the weight (Kg) by squared height (m<sup>2</sup>), c) the comparison of the frequency of those who never smoked cigarette with those who were cigarette smokers between two groups, d) Fasting blood glucose; Normal (<126 mg/dl) and Diabetic (FBG≥ 126 mg/dl), e) Cholesterol; Normal (<240 mg/dl) and Hypercholesterolemia (>240 mg/dl), f) Triglyceride; Normal (<200 mg/dl) and Hypertriglyceridemia (>200 mg/dl), g) High density lipoprotein; Normal (>40 mg/dl) and Low HDL (<40 mg/dl), h) Low density lipoprotein; Normal (<130 mg/dl) and High LDL (>130mg/dl), i) Blood pressure; Normal (<140/90) and Hypertensive (>140/90), j). Because the two variables of adiponectin (uniteµg/ml) and leptin(uniteµg/ml) were not normally distributed, we logarithmically transformed them.
